# Supplementary material for: Facile fabrication of graphene–polypyrrole–Mn composites as high-performance electrodes for capacitive deionization
Source: Royal Society of Chemistry journal article supplement (doi:10.1039/c4ta06646d), 2015-01-01
Supplement: c4ta06646d1.pdf [file c4ta06646d1.pdf]

## Electronic Supplementary Information

### Facile fabrication of graphene-polypyrrole-Mn composites as high performance electrodes for capacitive deionization

Xiaoyu Gu, Yu Yang, Yang Hu, Meng Hu, Jian Huang and Chaoyang Wang\*

**Table S1** – BET results of samples.

| Samples                                   | Specific surface area<br>(m <sup>2</sup> /g) | Average pore diameter<br>(nm) | Total pore volume<br>(cm <sup>3</sup> /g) |
|-------------------------------------------|----------------------------------------------|-------------------------------|-------------------------------------------|
| RGO                                       | 120                                          | 8.6                           | 0.31                                      |
| PPy                                       | 63                                           | 10.8                          | 0.21                                      |
| RGO-PPy <sub>0.5</sub> -Mn <sub>0.4</sub> | 331                                          | 8.6                           | 1.07                                      |
| RGO-PPy <sub>0.5</sub> -Cu <sub>1</sub>   | 144                                          | 8.8                           | 0.33                                      |

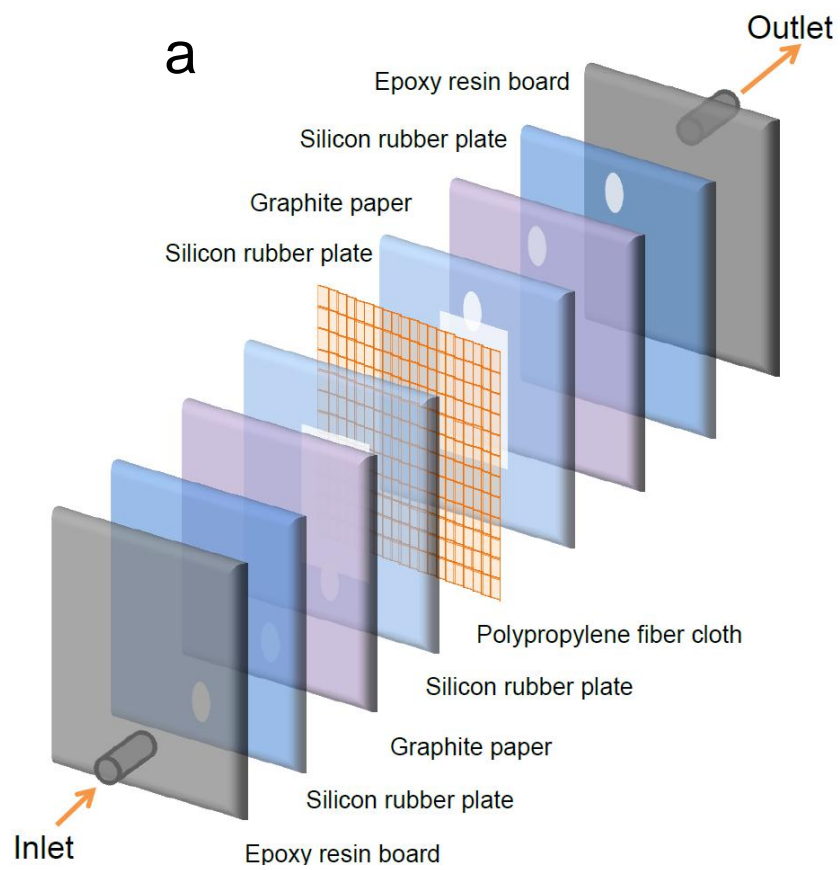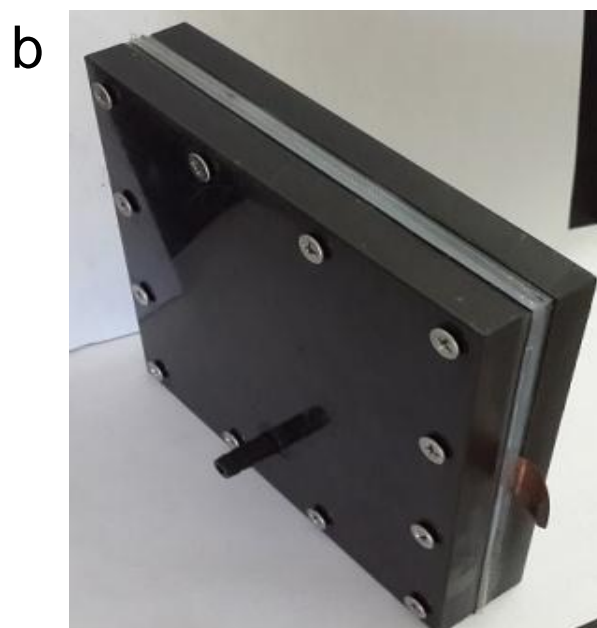

**Fig. S1** - (a) Schematic illustration of single CDI device and (b) photo of the combined CDI device.

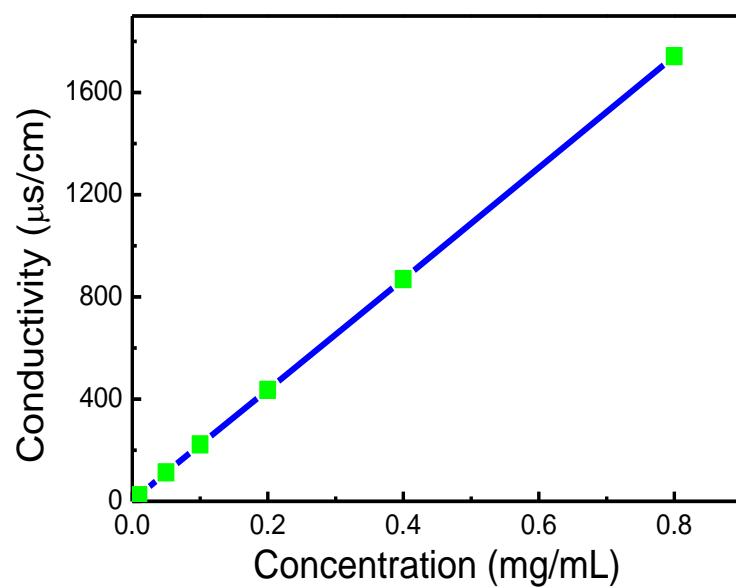

**Fig. S2** - Relationship between conductivity and concentration of NaCl solutions.

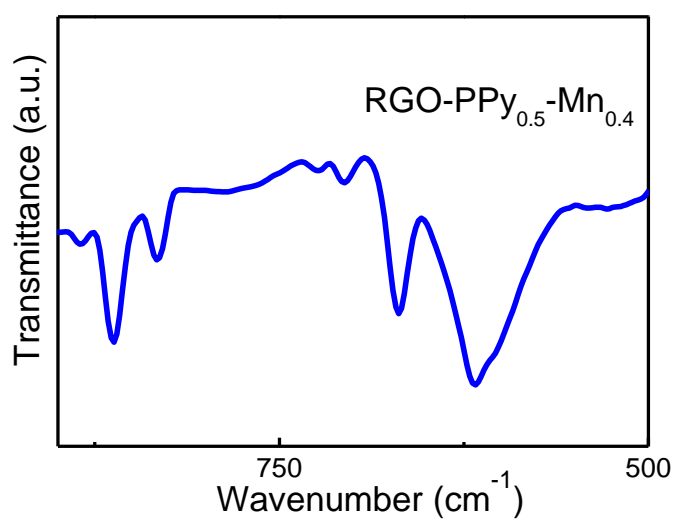

**Fig. S3** - FT-IR spectra of RGO-PPy-Mn composites from 900 to 500 cm<sup>-1</sup>

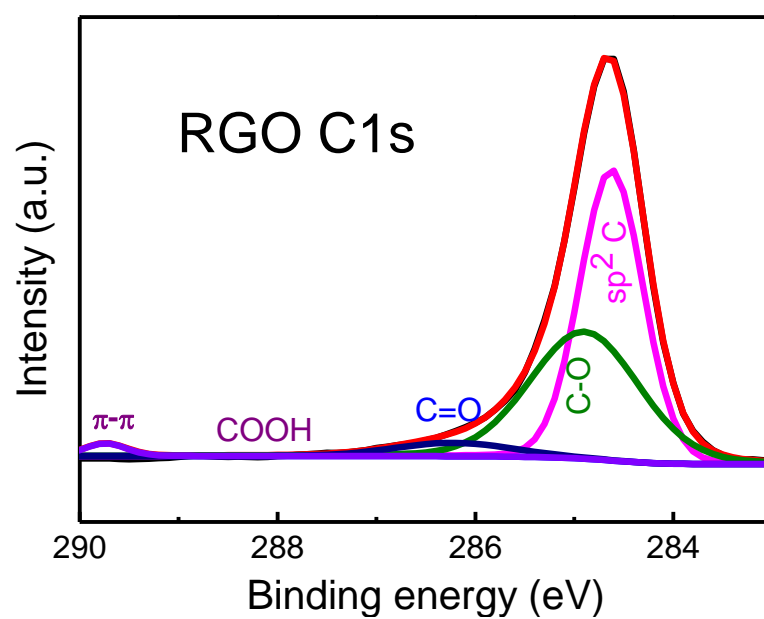

**Fig. S4** - XPS C1s spectra of RGO.

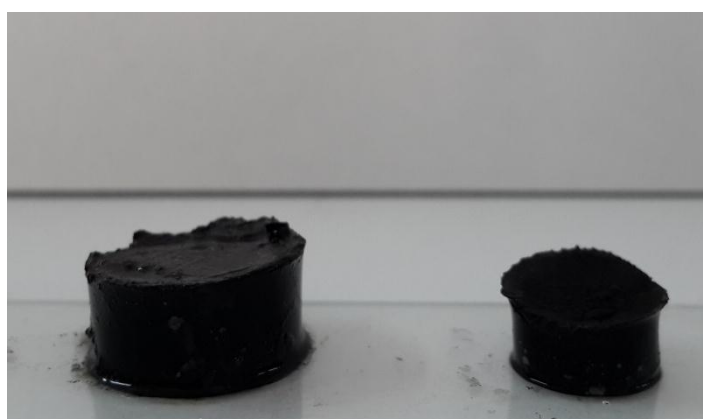

**Fig. S5** - Photo of RGO-PPy and RGO hydrogels.

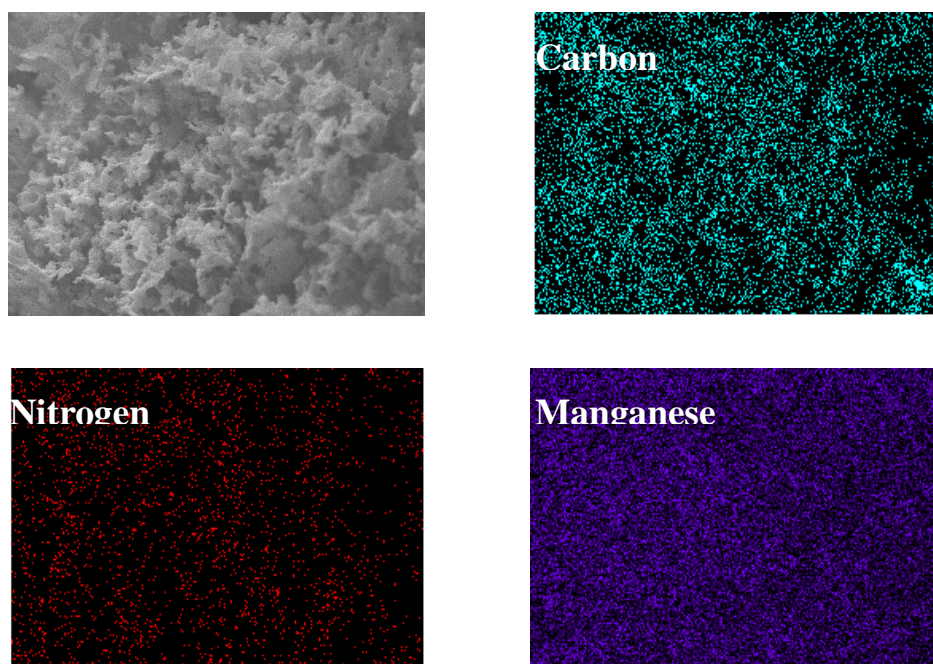

**Fig. S6** - SEM image and C-, N- and Mn- elemental mappings for RGO-PPy-Mn composites.

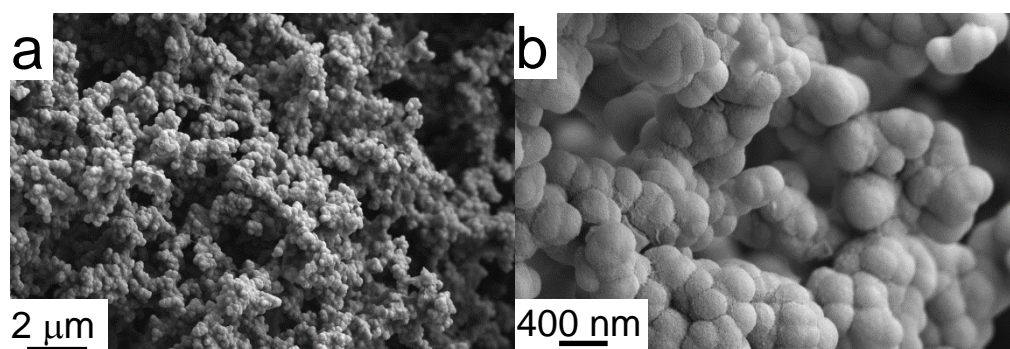

**Fig. S7** - (a,b) SEM images of PPy nanoparticles with different magnifications.

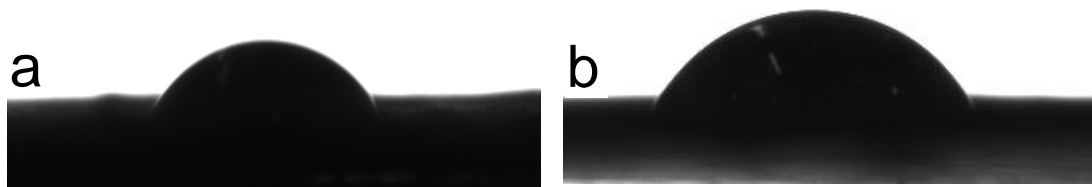

**Fig. S8** - Contact angle images of water droplets on (a) RGO and (b) RGO-PPy-Mn electrodes

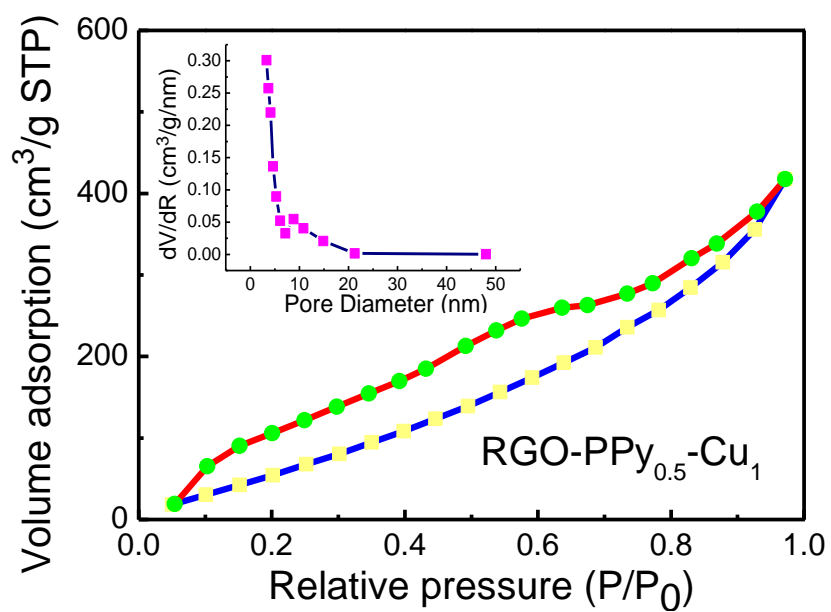

**Fig. S9** - Nitrogen sorption isotherm and pore size distribution (inset) of RGO-PPy<sub>0.5</sub>-Cu<sub>1</sub>.

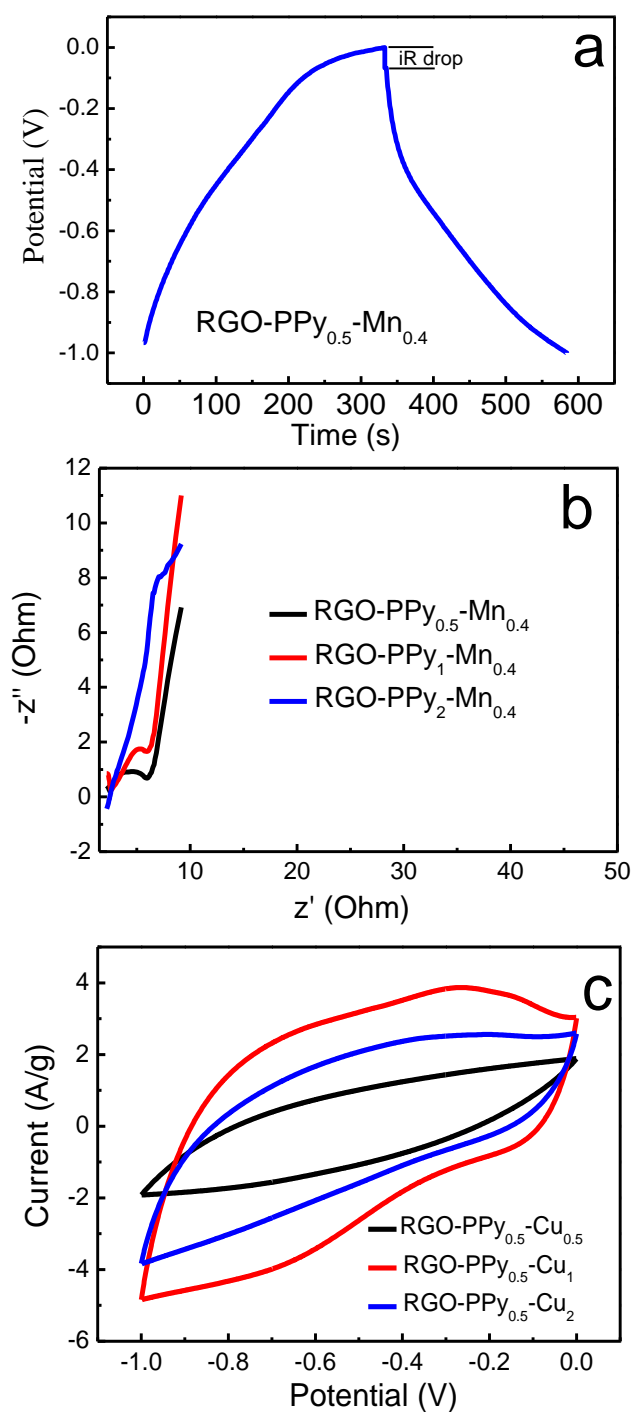

**Fig. S10** - (a) GC curves at a current of 1 A/g of RGO-PPy<sub>0.5</sub>-Mn<sub>0.4</sub> electrodes, iR drop was about 0.06 V. (b) Nyquist plots of the EIS for RGO-PPy-Mn electrodes and (c) CV curves of RGO-PPy-Cu electrodes at a scan rate of 10 mV/s.
